# Supplementary material for: Enhancing the electrochemical properties of TiNb2O7 anodes with SP-CNT binary conductive agents for both liquid and solid state lithium ion batteries
Source: Royal Society of Chemistry journal article supplement (doi:10.1039/d4ra02216e), 2024-01-01
Supplement: d4ra02216e1.pdf [file d4ra02216e1.pdf]

Supporting Information

**Enhancing the electrochemical properties of  $\text{TiNb}_2\text{O}_7$  anode with SP-CNT binary conductive agents for both liquid and solid state lithium ion batteries**

Li-Qian Cheng,<sup>a</sup> Xinyuan Xie,<sup>a</sup> Kai Chen,<sup>\*b</sup> Yijuan He,<sup>a</sup> Hu Xu,<sup>a</sup> Ruiping Liu<sup>a</sup> and Ming Feng<sup>\*c</sup>

<sup>a</sup>*Department of Materials Science and Engineering, China University of Mining & Technology, Beijing, 100083, Beijing, China.*

<sup>b</sup>*QingTao (Kunshan) Energy Development Co., Ltd., 215334, Suzhou, China.*

<sup>c</sup>*Key Laboratory of Functional Materials Physics and Chemistry of the Ministry of Education, Jilin Normal University, 130103, Changchun, China.*

\*Corresponding authors. Email: [chenkai\\_qingtao@163.com](mailto:chenkai_qingtao@163.com); Email: [mingfeng@jlnu.edu.cn](mailto:mingfeng@jlnu.edu.cn)

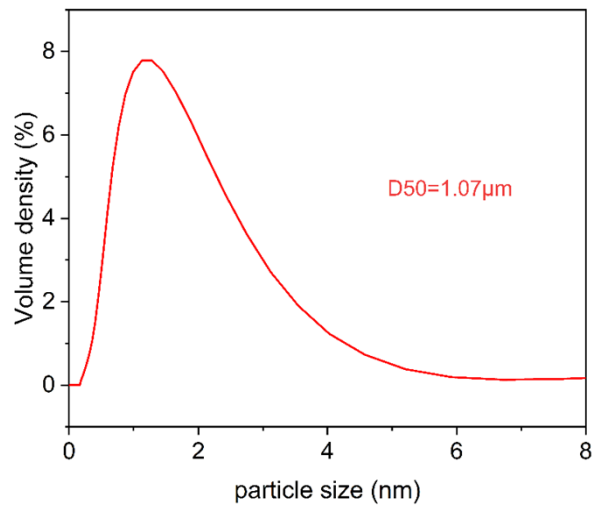

Fig. S1 The laser particle size distribution of the TNO powders.

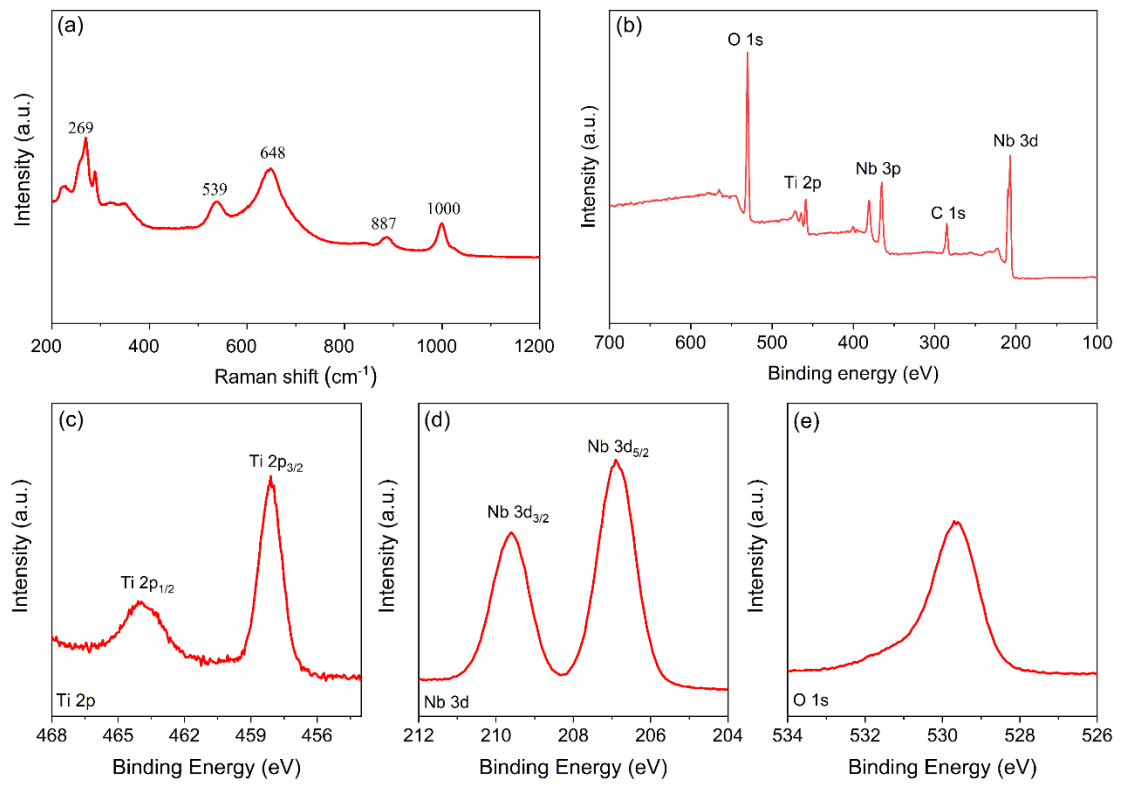

Fig. S2 (a) Raman spectra of the TNO powders. XPS spectra of (b) the wide scan, (c) Ti 2p, (d) Nb 3d and (e) O 1s of TNO powders.

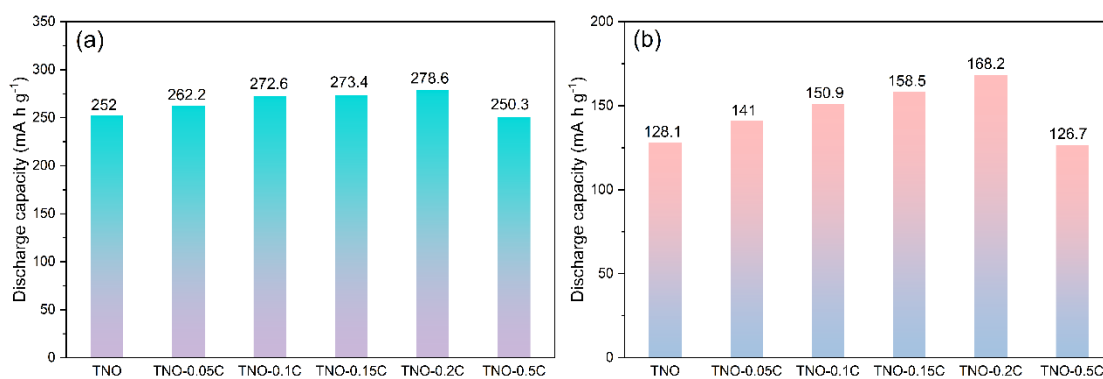

Fig. S3 Discharge capacities of TNO and TNO-C anodes at (a) 0.5C and (b) 10C.

Table S1 Properties comparison among reported TNO anodes and this work.

| Materials   | Synthesized method     | Morphological characteristics | Rate capacity (mA h g <sup>-1</sup> ) |       | Cyclic performance (mA h g <sup>-1</sup> ) | Ref.      |
|-------------|------------------------|-------------------------------|---------------------------------------|-------|--------------------------------------------|-----------|
|             |                        |                               | 1C                                    | 10C   |                                            |           |
| Sn-TNO      | Solid state synthesis  | Bulk particle (1μm)           | 245                                   | 146   | 183.6 (5C, after 200 cycles)               | 1         |
| TNO/RGO     | Solid state synthesis  | Bulk particle (500nm)         | 220                                   | 100   | 173 (1C, after 50 cycles)                  | 2         |
| MS-TNO      | Solvothermal method    | Nanosheet (500nm)             | 276                                   | 165.8 | 245.8 (5C, after 1000 cycles)              | 3         |
| Al-TNO      | Solvothermal method    | Nanoparticle (200nm)          | 261                                   | 207   | 154.7 (5C, after 250)                      | 4         |
| TNO/MWCN Ts | Solvothermal method    | Nanoparticle (200nm)          | 260                                   | 95    | 145.6 (1C, after 200)                      | 5         |
| P-TNO       | Solvothermal method    | Nanosphere (300nm)            | 238                                   | 149.6 | 141.5 (10C, after 1000)                    | 6         |
| Cu-TNO      | Solvothermal method    | Nanosphere (1μm)              | 234                                   | 200   | 214 (1C, after 100 cycles)                 | 7         |
| TNO/NC      | Electrospinning method | Nanowires (diameter:300nm)    | 210                                   | 162   | 148.9 (10 C, after 900 cycles)             | 8         |
| Cr-TNO      | Hydrothermal method    | Columnar morphology (50 nm)   | 255                                   | 178.2 | 187.8 (5C, after 500 cycles)               | 9         |
| EG-TNO      | Solvothermal method    | Nanosphere (1μm)              | 220                                   | 80    | 133.9 (1C, after 200 cycles)               | 10        |
| TNO-0.2C    | Solid state synthesis  | Bulk particle (1μm)           | 256                                   | 178.1 | 222.8 (1.5C, after 200 cycles)             | This work |

Table S2 Formula Symbol Unit Table

| Physical quantity                    | Abbreviation | Unit                                             |
|--------------------------------------|--------------|--------------------------------------------------|
| Gas constant                         | R            | $\text{J}\cdot\text{mol}^{-1}\cdot\text{K}^{-1}$ |
| Absolute temperature                 | T            | K                                                |
| Surface area of the electrode        | A            | $\text{cm}^2$                                    |
| Electron-transfer number             | n            | -                                                |
| Faraday constant                     | F            | $\text{A}\cdot\text{s}\cdot\text{mol}^{-1}$      |
| Molar concentration of $\text{Li}^+$ | C            | $\text{mol}\cdot\text{L}^{-1}$                   |
| Angular frequency                    | $\omega$     | $\text{s}^{-1}$                                  |
| Warburg coefficient                  | $\sigma$     | $\Omega\cdot\text{cm}^2\cdot\text{mol}$          |

### Notes and references

1 H. W. Bian, J. J. Gu, Z. C. Song, H. X. Gong, Z. X. Zhang, W. T. Mao and K. Y. Bao, *Journal of Materials Science-Materials in Electronics*, 2023, 34.

2 W. L. Wang, B. Y. Oh, J. Y. Park, H. Ki, J. Jang, G. Y. Lee, H. B. Gu and M. H. Ham, *Journal of Power Sources*, 2015, 300, 272-278.

3 D. W. Liang, Y. Lu, L. Hu, L. L. Wang, S. Liang, X. Liang, L. L. Liu, Z. Z. Xu, C. L. Han and C. H. Liang, *Journal of Power Sources*, 2022, 544.

4 R. Muruganantham, M. C. Lin, P. K. Wang, B. K. Chang and W. R. Liu, *Journal of the Taiwan Institute of Chemical Engineers*, 2022, 131.

5 H. I. Oskouei, H. Aghamohammadi and R. Eslami-Farsani, *Ceramics International*, 2022, 48, 14717-14725.

6 S. Lou, X. Cheng, J. Gao, Q. Li, L. Wang, Y. Cao, Y. Ma, P. Zuo, Y. Gao, C. Du, H. Huo and G. Yi, *Energy Storage Materials*, 2018, 11, 57-66.

7 C. F. Yang, D. W. Ma, J. Yang, M. Manawan, T. Zhao, Y. Y. Feng, J. H. Li, Z. Z. Liu, Y. W. Zhang, R. B. Von Dreele, B. H. Toby, C. P. D. Albarrán and J. H. Pan, *Advanced Functional Materials*, 2023, 33.

8 H. X. Yu, X. Cheng, H. J. Zhu, R. T. Zheng, T. T. Liu, J. D. Zhang, M. Shui, Y. Xie and J. Shu, *Nano Energy*, 2018, 54, 227-237.

9 Y. S. Hsiao, L. Y. Chang, C. W. Hu, C. Z. Lu, N. J. Wu, Y. L. Chen, T. H. Hsieh, J. H. Huang, S. C. Hsu, H. C. Weng and C. P. Chen, *Applied Surface Science*, 2023, 614.

10 H. Aghamohammadi and R. Eslami-Farsani, *Journal of Power Sources*, 2022, 535.
